# Supplementary material for: Nose to brain targeting of the donepezil nanostructured lipid carrier in situ gel: formulation, in vitro, ex vivo, in vivo pharmacokinetic and pharmacodynamic characterization
Source: Royal Society of Chemistry journal article supplement (doi:10.1039/d4pm00174e), 2024-01-01
Supplement: d4pm00174e1.pdf [file d4pm00174e1.pdf]

## Nose to brain targeting of donepezil nanostructured lipid carrier insitu gel: Formulation, *In-vitro*, *Ex-vivo*, *in- vivo* pharmacokinetic and Pharmacodynamic characterizations

**Table S1.** Summary of results of regression analysis for responses Y1, Y2, Y3

| Result of Analysis of variance   | Particle size (nm) | Drug Loading (%) | Entrapment Efficiency (%) |
|----------------------------------|--------------------|------------------|---------------------------|
| <b>Regression</b>                |                    |                  |                           |
| Sum of squares                   | 3.139E+05          | 4447.51          | 815.44                    |
| Degree of freedom                | 11                 | 11               | 11                        |
| Mean squares                     | 28537.35           | 28404.32         | 74.13                     |
| F-value                          | 16.47              | 15.25            | 34.32                     |
| P-value                          | 0.0206             | 0.0504           | 0.041                     |
| Inference                        | significant        | significant      | significant               |
| <b>Lack of fit test</b>          |                    |                  |                           |
| Sum of squares                   | 98711.03           | 1310.70          | 99.60                     |
| Degree of freedom                | 3                  | 3                | 3                         |
| Mean squares                     | 32903.68           | 436.90           | 33.20                     |
| R <sup>2</sup>                   | 0.9837             | 0.9506           | 0.9921                    |
| Correlation of validation (% CV) | 2.05               | 2.3              | 1.58                      |
| Adequate Precision               | 15.2578            | 6.8979           | 19.3224                   |
| <b>Residual</b>                  |                    |                  |                           |
| Sum of squares                   | 5196.90            | 231.23           | 6.48                      |
| Degree of freedom                | 3                  | 3                | 3                         |
| Mean squares                     | 1732.30            | 77.08            | 2.16                      |
| Standard deviation               | 41.62              | 8.78             | 1.47                      |

### Data optimization and response surface methodology validation (RSM)

Based on the values of characteristic parameters like particle size, drug loading and entrapment efficiency the DPZ NLC6 was chosen for further optimization by point prediction i.e., further small changes were made in independent constraints either in single constraints or more than one together. By setting constraints for particle size as minimum, drug loading and entrapment efficiency as maximum the optimization by point prediction was performed . The composition of the batch was 75:25(ratio of solid to liquid lipid), 0.9% surfactant and 12HPH cycle .The value of particle size, drug loading and entrapment efficiency for the selected batch was  $112.5 \pm 2.44$ nm,  $58.0 \pm 2.13$ % and  $98.7 \pm 4.01$ %respectively. The obtained size of DPZ- NLC- OPT is appropriate for brain targeting as reported in the previous literature ( $\leq 200$  nm is suitable for the nose to brain delivery). The zeta potential value for DPZ- NLC- OPT shows the highest value i.e.-23.2mV amongst all batches. The model validity was estimated with desirability value 1.

Table S2. Point prediction check point for optimization

| Batch           | Composition<br>SL:LLratio /<br>Surf (%) / HPH<br>cycle | Actual value               |                           |                                    | Predicted value             |                           |                                    |
|-----------------|--------------------------------------------------------|----------------------------|---------------------------|------------------------------------|-----------------------------|---------------------------|------------------------------------|
|                 |                                                        | Particle<br>Size(nm)<br>Y1 | Drug<br>Loading<br>(%) Y2 | Entrapment<br>Efficiency (%)<br>Y3 | Particle<br>Size (nm)<br>Y1 | Drug<br>Loading<br>(%) Y2 | Entrapment<br>Efficiency (%)<br>Y3 |
| DPZ-NLC6        | 70:30 /1 /10                                           | 123±2.05                   | 57.99±2.02                | 98.5±3.17                          | 123                         | 57.99                     | 98.5                               |
| DPZ-<br>NLCOPT1 | 75:25 /0.9 /12                                         | 112.5± 2.44                | 58.0±2.13                 | 98.7± 4.01                         | 78.41                       | 59.65                     | 99.45                              |

Table S3. In-vitro release kinetic parameters.

| Formulation   | Zero order     |                      | First order    |                      | Higuchi model  |                      | Korsmeyer –peppas |                      |
|---------------|----------------|----------------------|----------------|----------------------|----------------|----------------------|-------------------|----------------------|
|               | R <sup>2</sup> | K0(h <sup>-1</sup> ) | R <sup>2</sup> | K0(h <sup>-1</sup> ) | R <sup>2</sup> | K0(h <sup>-1</sup> ) | R <sup>2</sup>    | K0(h <sup>-1</sup> ) |
| DPZ-NLC-OPT   | 0.7784         | 3.6009               | 0.965          | 0.3828               | 0.977          | 10.954               | 0.9512            | 0.3556               |
| Pure drug DPZ | 0.9383         | 3.5536               | 0.8818         | 0.3499               | 0.9708         | 15.492               | 0.9387            | 0.2954               |
